# Supplementary material for: SARS-CoV-2 RNA and antibodies in tear fluid
Source: PubMed Central journal article supplement — BMJ Open Ophthalmol. 2021 Apr 30;6(1):e000733. doi: 10.1136/bmjophth-2021-000733 (PMC8098291; doi:10.1136/bmjophth-2021-000733), 2021-04-30
Supplement: bmjophth-2021-000733supp001.pdf [file bmjophth-2021-000733supp001.pdf]

**Supplemental Table 1.** IgG ratio analysed by the anti-SARS-CoV-2 ELISA (EUROIMMUN) in tear fluid and serum of the IgG positive cohort.

| Study number | Sample site | Ratio IgG |
|--------------|-------------|-----------|
| 1            | Tears       | 1.15      |
|              | Serum       | 6.78      |
| 2            | Tears       | 0.35      |
|              | Serum       | 2.3       |
| 3            | Tears       | 0.19      |
|              | Serum       | 2.45      |
| 4            | Tears       | 0.87      |
|              | Serum       | 3.55      |
| 5            | Tears       | 0.12      |
|              | Serum       | 1.77      |
| 6            | Tears       | 0.12      |
|              | Serum       | 1.98      |
| 7            | Tears       | 1.33      |
|              | Serum       | 10.98     |
| 8            | Tears       | 0.55      |
|              | Serum       | 10.22     |
| 9            | Tears       | 0.14      |
|              | Serum       | 2.56      |
| 10           | Tears       | 0.56      |
|              | Serum       | 4.73      |
| 11           | Tears       | 0.16      |
|              | Serum       | 6.12      |
| 12           | Tears       | 0.22      |
|              | Serum       | 3.85      |
| 13           | Tears       | 0.18      |
|              | Serum       | 3.67      |
| 14           | Tears       | 0.08      |
|              | Serum       | 1.17      |
| 15           | Tears       | 0.27      |
|              | Serum       | 3.23      |
| 16           | Tears       | 0.08      |
|              | Serum       | 1.15      |
| 17           | Tears       | 0.41      |
|              | Serum       | 3.22      |
| 18           | Tears       | 0.07      |
|              | Serum       | 1.29      |
| 19           | Tears       | 0.47      |
|              | Serum       | 4.46      |
| 20           | Tears       | 0.1       |
|              | Serum       | 2.77      |
| 21           | Tears       | 0.05      |
|              | Serum       | 3.35      |
| 22           | Tears       | 0.64      |
|              | Serum       | 7.29      |
