# Supplementary material for: SARS-CoV-2 RNA and antibodies in tear fluid
Source: PubMed Central journal article supplement — BMJ Open Ophthalmol. 2021 Apr 30;6(1):e000733. doi: 10.1136/bmjophth-2021-000733 (PMC8098291; doi:10.1136/bmjophth-2021-000733), 2021-04-30
Supplement: bmjophth-2021-000733supp002.pdf [file bmjophth-2021-000733supp002.pdf]

**Supplemental Table 2.** IgA ratio analysed by the anti-SARS-CoV-2 ELISA (EUROIMMUN) in tear fluid and serum of the IgA positive cohort.

| Study number | Sample site | Ratio IgA |
|--------------|-------------|-----------|
| 1            | Tears       | 2.44      |
|              | Serum       | 5.27      |
| 2            | Tears       | 0.8       |
|              | Serum       | 0.8       |
| 3            | Tears       | 8.15      |
|              | Serum       | 5.82      |
| 4            | Tears       | 1.07      |
|              | Serum       | 1.08      |
| 5            | Tears       | 0.99      |
|              | Serum       | 4.29      |
| 6            | Tears       | 4.49      |
|              | Serum       | 4.76      |
| 7            | Tears       | 2.99      |
|              | Serum       | 2.62      |
| 8            | Tears       | 4.82      |
|              | Serum       | 7.35      |
| 9            | Tranen      | 0.72      |
|              | Serum       | 1.03      |
| 10           | Tears       | 1.24      |
|              | Serum       | 7.21      |
| 11           | Tranen      | 7.01      |
|              | Serum       | 1.96      |
| 12           | Tears       | 1.69      |
|              | Serum       | 2.47      |
| 13           | Tears       | 4.17      |
|              | Serum       | 4.11      |
| 14           | Tears       | 0.88      |
|              | Serum       | 2.09      |
| 15           | Tears       | 3.06      |
|              | Serum       | 0.86      |
| 16           | Tears       | 1.56      |
|              | Serum       | 0.81      |
| 17           | Tears       | 2.21      |
|              | Serum       | 2.99      |
| 18           | Tears       | 2.03      |
|              | Serum       | 1.84      |
| 19           | Tears       | 2.38      |
|              | Serum       | 6.08      |
| 20           | Tears       | 4.69      |
|              | Serum       | 2.92      |
| 21           | Tears       | 0.81      |
|              | Serum       | 2.84      |
| 22           | Tears       | >9        |
|              | Serum       | >9        |
