# Supplementary material for: SARS-CoV-2 RNA and antibodies in tear fluid
Source: PubMed Central journal article supplement — BMJ Open Ophthalmol. 2021 Apr 30;6(1):e000733. doi: 10.1136/bmjophth-2021-000733 (PMC8098291; doi:10.1136/bmjophth-2021-000733), 2021-04-30
Supplement: bmjophth-2021-000733supp003.pdf [file bmjophth-2021-000733supp003.pdf]

**Supplemental Table 3.** IgG and IgA ratio analysed by the anti-SARS-CoV-2 ELISA (EUROIMMUN) in tear fluid and serum of the control cohort.

| Study number | Sample site | Ratio IgG | Ratio IgA |
|--------------|-------------|-----------|-----------|
| 1            | Tears       | 0.10      | 0.50      |
|              | Serum       | 0.17      | 0.25      |
| 2            | Tears       | 0.11      | 0.90      |
|              | Serum       | 0.34      | 0.28      |
| 3            | Tears       | 0.05      | 1.05      |
|              | Serum       | 0.10      | 0.27      |
| 4            | Tears       | 0.05      | 0.91      |
|              | Serum       | 0.07      | 0.18      |
| 5            | Tears       | 0.05      | 0.90      |
|              | Serum       | 0.09      | 0.53      |
| 6            | Tears       | 0.07      | 0.90      |
|              | Serum       | 0.07      | 0.47      |
| 7            | Tears       | 0.04      | 1.33      |
|              | Serum       | 0.06      | 0.22      |
| 8            | Tears       | 0.04      | 1.12      |
|              | Serum       | 0.05      | 0.33      |
| 9            | Tears       | 0.05      | 1.46      |
|              | Serum       | 0.11      | 0.26      |
| 10           | Tears       | 0.06      | 0.93      |
|              | Serum       | 0.05      | 0.37      |
| 11           | Tears       | 0.07      | 1.18      |
|              | Serum       | 0.06      | 0.43      |
| 12           | Tears       | 0.07      | 1.17      |
|              | Serum       | 0.06      | 0.22      |
| 13           | Tears       | 0.09      | 1.74      |
|              | Serum       | 0.13      | 0.25      |
| 14           | Tears       | 0.08      | 1.86      |
|              | Serum       | 0.11      | 0.68      |
| 15           | Tears       | 0.16      | 0.93      |
|              | Serum       | 0.27      | 0.31      |
